# Supplementary material
Source: Research Square preprint supplement (doi:10.21203/rs.3.rs-8967609/v1)
Supplement: Supplementary file 1 [file 055e3d0c43b91910c1ad4976.xlsx]

## Sheet: SNP_12 isolates
Isolates	KPIDA0004-II	KPIDA0004A-I	KPIDA0060-I	KPIDA0060B-II	KPIDA0127A-I	KPIDA0127B-II	KPIDA0149A-I	KPIDA0149B-II	KPIDA0268A-I	KPIDA0268B-II	KPIDC0030A-I	KPIDC0030B-II
KPIDA0004-II	0	24165	23926	23934	22888	25460	23616	23670	23380	25462	24716	24605
KPIDA0004A-I	24165	0	23968	23971	24526	25586	23688	23699	25003	25575	23397	23362
KPIDA0060-I	23926	23968	0	6	23632	25590	23647	23676	24014	25593	24393	24304
KPIDA0060B-II	23934	23971	6	0	23641	25597	23647	23680	24018	25599	24396	24306
KPIDA0127A-I	22888	24526	23632	23641	0	25124	22480	22537	20930	25116	24496	24315
KPIDA0127B-II	25460	25586	25590	25597	25124	0	25125	25151	24315	33	25549	25473
KPIDA0149A-I	23616	23688	23647	23647	22480	25125	0	8	24103	25116	24196	24063
KPIDA0149B-II	23670	23699	23676	23680	22537	25151	8	0	24132	25147	24209	24118
KPIDA0268A-I	23380	25003	24014	24018	20930	24315	24103	24132	0	24308	23983	23644
KPIDA0268B-II	25462	25575	25593	25599	25116	33	25116	25147	24308	0	25557	25481
KPIDC0030A-I	24716	23397	24393	24396	24496	25549	24196	24209	23983	25557	0	72
KPIDC0030B-II	24605	23362	24304	24306	24315	25473	24063	24118	23644	25481	72	0

## Sheet: ST1 Summary Molecular Epi 
	By study site N=508			By category of infection N=508			TOTAL N=508
	CHBAH	CMJAH	HJH	pCAI	pHAI	Unknown
	(N= 287 )	(N= 191 )	(N= 30)	(N= 64)	(N= 390)	(N= 54)
Sequence types (ST)
ST2497	46	45	1	1	84	7	92
ST39	48	12	1	2	48	11	61
ST9094	22	21	5	3	42	3	48
ST17	20	13	3	1	30	5	36
ST307	7	7	4	1	15	2	18
ST5785	13	2	0	0	15	0	15
ST985	10	3	1	0	12	2	14
ST23	8	3	1	4	4	4	12
ST147	8	3	0	0	8	3	11
ST101	7	2	0	0	8	1	9
ST66	8	1	0	6	2	1	9
ST86	3	2	4	5	4	0	9
ST37	4	3	1	2	4	2	8
ST45	2	4	1	0	7	0	7
ST607	1	6	0	0	4	3	7
ST1731	5	1	0	1	4	1	6
ST25	4	2	0	2	3	1	6
ST9190	4	1	0	0	5	0	5
ST22	4	1	0	0	5	0	5
ST13	1	3	0	1	3	0	4
ST14	2	2	0	0	3	1	4
ST20	3	0	1	2	2	0	4
ST9461	2	1	0	1	0	2	3
ST9465	1	0	0	1	0	0	1
ST4083	1	3	0	0	4	0	4
ST152	2	1	0	1	2	0	3
ST198	0	3	0	0	3	0	3
ST29	0	3	0	0	3	0	3
ST35	2	1	0	1	2	0	3
ST36	1	2	0	0	3	0	3
ST48	0	3	0	0	3	0	3
ST65	1	2	0	2	1	0	3
ST105	1	1	0	1	1	0	2
ST1401	2	0	0	1	1	0	2
ST219	0	2	0	0	2	0	2
ST26	0	2	0	1	1	0	2
ST2816	0	2	0	0	1	1	2
ST299	1	1	0	1	1	0	2
ST309	1	1	0	1	1	0	2
ST9469	1	0	0	0	1	0	1
ST9480	0	1	0	0	1	0	1
ST380	0	2	0	0	2	0	2
ST4991	2	0	0	0	2	0	2
ST528	2	0	0	1	1	0	2
ST1015	0	1	0	0	0	1	1
ST1037	1	0	0	0	1	0	1
ST9464	1	0	0	1	0	0	1
ST1049	1	0	0	1	0	0	1
ST1063	1	0	0	1	0	0	1
ST1189	0	1	0	0	1	0	1
ST9477	0	1	0	0	1	0	1
ST9460	1	0	0	0	1	0	1
ST1380	1	0	0	0	1	0	1
ST140	1	0	0	0	1	0	1
ST1427	1	0	0	0	1	0	1
ST15	0	1	0	0	0	1	1
ST9472	0	1	0	0	1	0	1
ST158	0	0	1	1	0	0	1
ST16	1	0	0	0	1	0	1
ST160	0	0	1	0	1	0	1
ST1621	0	0	1	1	0	0	1
ST9245	0	1	0	0	1	0	1
ST163	1	0	0	0	1	0	1
ST1779	1	0	0	0	1	0	1
ST1799	0	1	0	1	0	0	1
ST1805	1	0	0	0	1	0	1
ST1886	1	0	0	1	0	0	1
ST1966	1	0	0	0	1	0	1
ST1999	0	1	0	0	1	0	1
ST9482	0	1	0	0	0	1	1
ST9467	1	0	0	0	1	0	1
ST2433	1	0	0	0	1	0	1
ST252	1	0	0	0	1	0	1
ST253	1	0	0	0	1	0	1
ST2597	0	1	0	0	1	0	1
ST2621	1	0	0	0	1	0	1
ST268	1	0	0	1	0	0	1
ST280	0	1	0	0	1	0	1
ST292	0	0	1	0	1	0	1
ST3048	1	0	0	1	0	0	1
ST3213	1	0	0	1	0	0	1
ST327	1	0	0	1	0	0	1
ST337	0	1	0	1	0	0	1
ST3385	1	0	0	1	0	0	1
ST34	1	0	0	0	1	0	1
ST340	1	0	0	0	1	0	1
ST3484	0	0	1	0	1	0	1
ST353	0	1	0	0	1	0	1
ST3559	0	1	0	0	1	0	1
ST382	1	0	0	1	0	0	1
ST394	1	0	0	0	1	0	1
ST405	0	1	0	0	1	0	1
ST9476	0	1	0	0	1	0	1
ST42	0	1	0	1	0	0	1
ST458	1	0	0	1	0	0	1
ST460	0	1	0	0	1	0	1
ST469	1	0	0	0	1	0	1
ST474	0	1	0	0	1	0	1
ST4813	1	0	0	1	0	0	1
ST485	0	1	0	0	0	1	1
ST5034	0	1	0	0	1	0	1
ST5165	1	0	0	1	0	0	1
ST5776	0	1	0	0	1	0	1
ST661	0	0	1	0	1	0	1
ST6959	0	0	1	0	1	0	1
ST70	0	1	0	0	1	0	1
ST711	1	0	0	0	1	0	1
ST716	1	0	0	1	0	0	1
ST719	1	0	0	0	1	0	1
ST9468	1	0	0	1	0	0	1
ST950	1	0	0	1	0	0	1
K-loci
KL64	54	48	1	1	92	10	103
KL25	48	41	8	4	83	10	97
KL2	57	14	4	19	45	11	75
KL149	15	10	1	2	19	5	26
KL30	15	10	0	1	23	1	25
KL102	9	9	4	2	18	2	22
KL39	11	4	1	1	13	2	16
KL1	9	4	1	4	5	5	14
KL122	7	3	0	2	6	2	10
KL17	6	4	0	0	9	1	10
KL24	3	5	0	1	6	1	8
KL38	3	4	1	1	7	0	8
KL9	6	1	1	2	6	0	8
KL15	4	2	0	2	4	0	6
KL62	0	5	1	0	6	0	6
KL28	2	2	1	1	3	1	5
KL3	2	3	0	1	4	0	5
KL35	1	3	0	0	4	0	4
KL110	2	1	0	3	0	0	3
KL27	1	1	1	0	3	0	3
KL46	2	0	1	2	1	0	3
KL48	2	1	0	0	3	0	3
KL55	2	1	0	1	2	0	3
KL58	3	0	0	1	2	0	3
KL7	2	1	0	2	1	0	3
KL109	2	0	0	0	2	0	2
KL12	1	0	1	0	1	1	2
KL121	1	1	0	0	2	0	2
KL16	1	1	0	2	0	0	2
KL22	1	1	0	0	2	0	2
KL42	1	1	0	1	1	0	2
KL51	1	0	1	0	2	0	2
KL57	2	0	0	2	0	0	2
KL10	0	1	0	1	0	0	1
KL106	1	0	0	0	0	1	1
KL111	1	0	0	1	0	0	1
KL114	0	1	0	0	1	0	1
KL125	0	1	0	0	1	0	1
KL126	0	1	0	0	1	0	1
KL127	0	0	1	0	1	0	1
KL13	1	0	0	1	0	0	1
KL139	1	0	0	0	1	0	1
KL14	1	0	0	0	0	1	1
KL140	0	1	0	0	1	0	1
KL151	0	1	0	0	1	0	1
KL169	0	0	1	0	1	0	1
KL174	1	0	0	0	1	0	1
KL19	0	1	0	0	1	0	1
KL20	1	0	0	1	0	0	1
KL23	0	1	0	0	1	0	1
KL43	0	1	0	1	0	0	1
KL5	1	0	0	1	0	0	1
KL52	0	1	0	0	1	0	1
KL54	1	0	0	0	1	0	1
KL67	1	0	0	0	1	0	1
KL81	1	0	0	0	1	0	1
O-loci
OL2α.1	121	89	6	23	168	25	216
OL2α.2	97	52	10	28	111	20	159
OL5	46	35	8	4	78	7	89
OL3γ	9	4	3	4	11	1	16
OL4	7	7	0	4	10	0	14
OL13	4	2	1	0	7	0	7
OL3α/β	2	1	0	1	2	0	3
OL10	1	0	1	0	1	1	2
OL12	0	1	0	0	1	0	1
OL15	0	0	1	0	1	0	1
O-type
O1αβ,2α	117	78	6	25	154	22	201
O1αβ,2β	63	36	4	15	75	13	103
O5	46	35	8	4	78	7	89
O2β	25	15	6	6	34	6	46
O2α	12	12	0	4	16	4	24
O3γ	9	4	3	4	11	1	16
O4	7	7	0	4	10	0	14
O13	4	2	1	0	7	0	7
O3αβ	2	1	0	1	2	0	3
O10	1	0	1	0	1	1	2
O11αβ,2β	1	0	0	1	0	0	1
O12	0	1	0	0	1	0	1
Unknown (OL15)	0	0	1	0	1	0	1
Virulence score
0- negative for all of yersiniabactin, colibactin, aerobactin	65	56	10	25	95	11	131
1- yersiniabactin only	192	115	15	15	273	34	322
2- yersiniabactin and colibactin (or colibactin only)	1	0	0	0	1	0	1
3- aerobactin (without yersiniabactin or colibactin)	8	5	3	8	5	3	16
4- aerobactin with yersiniabactin (without colibactin)	0	9	1	2	8	0	10
5- yersiniabactin, colibactin and aerobactin	21	6	1	14	8	6	28
Resistance score
0- no ESBL, no carbapenemase (regardless of colistin resistance)	75	53	9	55	64	18	137
1- ESBL, no carbapenemase (regardless of colistin resistance)	27	33	9	3	61	5	69
2- Carbapenemase without colistin resistance (regardless of ESBL genes or OmpK mutations)	183	101	11	6	259	30	295
3- Carbapenemase with colistin resistance (regardless of ESBL genes or OmpK mutations)	2	4	1	0	6	1	7

## Sheet: ST2 Summary Phenotypic AMR
	By study site			TOTAL
	N= 508
	CHBAH	CMJAH	HJH	N= 508
	(N= 287 )	(N= 191 )	(N= 30)
Trimethoprim-sulfamethoxazole
Resistant	201/281 (71.5)	140/191 (73.3)	20/29 (69.0)	361/501 (72.1)
Intermediate	0/281 (0)	0/191 (0)	0/29 (0)	0/501 (0)
Chloramphenicol
Resistant	132/257 (51.4)	0/1 (0)	5/10 (50.0)	137/268 (51.1)
Intermediate	0/257 (0)	0/1 (0)	0/10 (0)	0/268 (0)
Ampicillin
Resistant	284/284 (100.0)	190/190 (100.0)	28/28 (100.0)	502/502 (100.0)
Intermediate	0/284 (0)	0/190 (0)	0/28 (0)	0/502 (0)
Amoxicillin-clavulanic acid
Resistant	214/285 (75.1)	141/191 (73.8)	17/30 (56.7)	372/506 (73.5)
Intermediate	0/285 (0)	4/191 (2.1)	1/30 (3.3)	5/506 (1.0)
Ciprofloxacin
Resistant	173/278 (62.2)	129/191 (67.5)	16/28 (57.1)	318/497 (64.0)
Intermediate	9/278 (3.2)	4/191 (2.1)	1/28 (3.6)	14/497 (2.8)
Ceftriaxone
Resistant	210/287 (73.2)	144/191 (75.4)	21/30 (70.0)	375/508 (73.8)
Intermediate	0/287 (0)	0/191 (0)	0/30 (0)	0/508 (0)
Ceftazidime
Resistant	206/284 (72.5)	139/190 (73.2)	17/29 (58.6)	362/503 (72.0)
Intermediate	0/284 (0)	0/190 (0)	0/29 (0)	0/503 (0)
Cefepime
Resistant	208/287 (72.5)	129/191 (67.5)	12/29 (41.4)	349/507 (68.8)
Intermediate	0/287 (0)	0/191 (0)	0/29 (0)	0/507 (0)
Gentamicin
Resistant	132/284 (46.5)	99/190 (52.1)	13/29 (44.8)	244/503 (48.5)
Intermediate	2/284 (0.7)	13/190 (6.8)	1/29 (3.4)	16/503 (3.2)
Amikacin
Resistant	91/286 (31.8)	72/191 (37.7)	5/29 (17.2)	174/506 (34.4)
Intermediate	33/286 (11.5)	2/191 (1.0)	3/29 (10.3)	38/506 (7.5)
Piperacillin-tazobactam
Resistant	194/287 (67.6)	126/188 (67.0)	17/30 (56.7)	337/505 (66.7)
Intermediate	4/287 (1.4)	6/188 (3.2)	0/30 (0)	10/505 (2.0)
Ertapenem Resistant
MIC ≥ 2 mg/L	137/284 (48.2)	78/189 (41.3)	9/30 (30.0)	224/503 (44.5)
No MIC result reported	37/284 (13.0)	11/189 (5.8)	2/30 (6.7)	50/503 (9.9)
Ertapenem Intermediate
MIC ≥ 1 and < 2 mg/L	2/284 (0.7)	3/189 (1.6)	0/30 (0)	5/503 (1.0)
No MIC result reported	0/284 (0)	0/189 (0)	0/30 (0)	0/503 (0)
Imipenem Resistant
MIC ≥ 4 mg/L	104/284 (36.6)	58/191 (30.4)	7/30 (23.3)	169/505 (33.5)
No MIC result reported	30/284 (10.6)	11/191 (5.8)	2/30 (6.7)	43/505 (8.5)
Imipenem Intermediate
MIC ≥ 2 and < 4 mg/L	16/284 (5.6)	9/191 (4.7)	0/30 (0)	25/505 (5.0)
No MIC result reported	6/284 (2.1)	1/191 (0.5)	0/30 (0)	7/505 (1.4)
Meropenem Resistant
MIC ≥ 4 mg/L	115/283 (40.6)	63/191 (33.0)	7/30 (23.3)	185/504 (36.7)
No MIC result reported	25/283 (8.8)	10/191 (5.2)	2/30 (6.7)	37/504 (7.3)
Meropenem Intermediate
MIC ≥ 2 and < 4 mg/L	17/283 (6.0)	8/191 (4.2)	0/30 (0)	25/504 (5.0)
No MIC result reported	3/283 (1.1)	0/191 (0)	0/30 (0)	3/504 (0.6)
Tigecycline	4/27 (14.8)	18/176 (10.2)	1/14 (7.1)	23/217 (10.6)
Colistina
MIC ≤ 2 mg/L	155/161 (96.3)	77/93 (82.8)	2/2 (100.0)	234/256 (91.4)
MIC ≥ 4 mg/L	6/161 (3.7)	16/93 (17.2)	0/2 (0)	22/256 (8.6)
Ceftazidime-avibactam	0	1/4 (25.0)	0	1/4 (25.0)
Resistance pattern	N=287	N=191	N=30	N=508
3GCb	210 (73.2)	144 (75.4)	21 (70.0)	375 (73.8)
CRKpc	182 (63.4)	109 (57.1)	11 (36.7)	302 (59.4)
MDRd	197 (68.6)	126 (66.0)	16 (53.3)	339 (66.7)
Carbapenemase testede	N=154	N=100	N=10	N=264
OXA-48	137 (89.0)	51 (51.0)	4 (40.0)	192 (72.7)
NDM	9 (5.8)	7 (7.0)	1 (10.0)	17 (6.4)
OXA-48 and NDM	6 (3.9)	42 (42.0)	5 (50.0)	53 (20.1)
Carbapenemase not detected	2 (1.3)	0	0	2 (0.8)

## Sheet: ST3 STs associated with bla
ST	CTX n=359	OXA n=282	NDM n= 131
ST2497	91	88	90
ST39	59	53	7
ST9094	44	43	6
ST17	32	34	3
ST5785	13	13	4
ST147	11	11	0
ST985	13	11	0
ST307	16	10	3
ST9190	5	5	0
ST22	4	3	4
ST25	2	2	1
ST14	4	1	0
ST16	1	1	0
ST23	1	1	0
ST2621	1	1	0
ST34	1	1	1
ST37	1	1	0
ST405	1	1	0
ST48	3	1	0
ST9472	1	1	0
ST101	8	0	0
ST1015	0	0	0
ST1037	0	0	0
ST1049	0	0	0
ST105	0	0	0
ST1063	0	0	0
ST1189	0	0	0
ST13	2	0	0
ST1380	0	0	0
ST140	0	0	0
ST1401	0	0	0
ST1427	1	0	0
ST15	0	0	0
ST152	2	0	1
ST158	0	0	0
ST160	1	0	0
ST1621	0	0	0
ST163	0	0	0
ST1731	5	0	5
ST1779	0	0	0
ST1799	0	0	0
ST1805	0	0	0
ST1886	0	0	0
ST1966	0	0	0
ST198	0	0	0
ST1999	0	0	0
ST20	1	0	0
ST219	1	0	0
ST2433	0	0	0
ST252	0	0	0
ST253	0	0	0
ST2597	0	0	1
ST26	0	0	0
ST268	0	0	0
ST280	1	0	0
ST2816	2	0	2
ST29	3	0	0
ST292	1	0	0
ST299	0	0	0
ST3048	0	0	0
ST309	1	0	0
ST3213	0	0	0
ST327	0	0	0
ST337	0	0	0
ST3385	0	0	0
ST340	1	0	1
ST3484	1	0	0
ST35	0	0	0
ST353	0	0	0
ST3559	1	0	0
ST36	1	0	0
ST380	0	0	0
ST382	0	0	0
ST394	1	0	0
ST4083	4	0	0
ST42	0	0	0
ST45	2	0	2
ST458	0	0	0
ST460	0	0	0
ST469	1	0	0
ST474	1	0	0
ST4813	0	0	0
ST485	0	0	0
ST4991	1	0	0
ST5034	0	0	0
ST5165	0	0	0
ST528	0	0	0
ST5776	0	0	0
ST607	7	0	0
ST65	0	0	0
ST66	0	0	0
ST661	1	0	0
ST6959	0	0	0
ST70	1	0	0
ST711	1	0	0
ST716	1	0	0
ST719	0	0	0
ST86	1	0	0
ST9245	0	0	0
ST9460	0	0	0
ST9461	0	0	0
ST9464	0	0	0
ST9465	0	0	0
ST9467	0	0	0
ST9468	0	0	0
ST9469	0	0	0
ST9476	0	0	0
ST9477	0	0	0
ST9480	0	0	0
ST9482	0	0	0
ST950	0	0	0

## Sheet: ST4 STs assoc with pheno AMR
N= 508	3GC-R, excluding CRKp n= 78	CRKp n= 302	MDR n= 339
ST2497	1	88	88
ST39	5	54	56
ST9094	2	43	43
ST17	2	30	31
ST307	7	11	13
ST5785	1	13	13
ST985	3	10	13
ST147	1	10	10
ST101	7	2	8
ST1731	0	5	5
ST45	3	2	5
ST22	0	4	4
ST607	7	0	4
ST9190	0	4	4
ST25	0	3	3
ST48	2	1	3
ST13	2	0	2
ST14	3	1	2
ST152	2	1	2
ST23	1	1	2
ST2816	0	2	2
ST29	3	0	2
ST1015	0	1	1
ST1427	1	0	1
ST16	0	1	1
ST160	1	0	1
ST20	1	0	1
ST2597	0	1	1
ST2621	0	1	1
ST292	1	0	1
ST34	0	1	1
ST340	0	1	1
ST35	0	1	1
ST353	0	1	1
ST3559	1	0	1
ST37	1	1	1
ST394	0	1	1
ST405	0	1	1
ST4083	4	0	1
ST460	0	1	1
ST474	0	1	1
ST66	0	1	1
ST711	1	0	1
ST86	1	1	1
ST9245	0	1	1
ST9472	0	1	1
ST1037	0	0	0
ST1049	0	0	0
ST105	0	0	0
ST1063	0	0	0
ST1189	0	0	0
ST1380	0	0	0
ST140	0	0	0
ST1401	0	0	0
ST15	0	0	0
ST158	0	0	0
ST1621	0	0	0
ST163	0	0	0
ST1779	1	0	0
ST1799	0	0	0
ST1805	1	0	0
ST1886	0	0	0
ST1966	0	0	0
ST198	1	0	0
ST1999	0	0	0
ST219	1	0	0
ST2433	0	0	0
ST252	0	0	0
ST253	0	0	0
ST26	1	0	0
ST268	0	0	0
ST280	1	0	0
ST299	0	0	0
ST3048	0	0	0
ST309	1	0	0
ST3213	0	0	0
ST327	0	0	0
ST337	0	0	0
ST3385	0	0	0
ST3484	1	0	0
ST36	1	0	0
ST380	0	0	0
ST382	0	0	0
ST42	0	0	0
ST458	0	0	0
ST469	1	0	0
ST4813	0	0	0
ST485	1	0	0
ST4991	1	0	0
ST5034	0	0	0
ST5165	0	0	0
ST528	0	0	0
ST5776	0	0	0
ST65	0	0	0
ST661	1	0	0
ST6959	0	0	0
ST70	1	0	0
ST716	0	0	0
ST719	0	0	0
ST9460	0	0	0
ST9461	0	0	0
ST9464	0	0	0
ST9465	0	0	0
ST9467	0	0	0
ST9468	0	0	0
ST9469	0	0	0
ST9476	0	0	0
ST9477	0	0	0
ST9480	0	0	0
ST9482	0	0	0
ST950	0	0	0

## Sheet: ST5 KL assoc with pheno AMR
N= 508	3GC-R, excluding CRKp n= 78	CRKp n= 302	MDR n= 339
KL64	2	98	98
KL25	11	78	83
KL2	5	40	41
KL149	5	21	23
KL30	4	15	16
KL102	8	11	13
KL39	3	10	13
KL17	7	3	9
KL122	1	5	5
KL24	2	2	4
KL62	3	1	4
KL9	0	4	4
KL3	2	1	3
KL1	1	1	2
KL15	0	2	2
KL38	3	1	2
KL106	0	1	1
KL125	0	1	1
KL127	1	0	1
KL140	0	1	1
KL151	0	1	1
KL174	0	1	1
KL19	1	0	1
KL22	0	1	1
KL27	2	0	1
KL28	2	0	1
KL35	4	0	1
KL48	1	1	1
KL51	1	0	1
KL52	0	1	1
KL54	1	0	1
KL67	1	0	1
KL81	0	1	1
KL10	0	0	0
KL109	1	0	0
KL110	0	0	0
KL111	0	0	0
KL114	1	0	0
KL12	1	0	0
KL121	0	0	0
KL126	0	0	0
KL13	0	0	0
KL139	1	0	0
KL14	0	0	0
KL16	0	0	0
KL169	0	0	0
KL20	0	0	0
KL23	1	0	0
KL42	1	0	0
KL43	0	0	0
KL46	0	0	0
KL5	0	0	0
KL55	1	0	0
KL57	0	0	0
KL58	0	0	0
KL7	0	0	0

## Sheet: ST6 Otypes assoc with phenoAMR
N= 508		3GC-R, excluding CRKp n= 78	CRKp n= 302	MDR n= 339
O1αβ,2α		25	131	145
O5		4	78	79
O1αβ,2β		22	49	62
O2β		10	23	25
O2α		4	12	14
O4		4	5	7
O13		3	2	4
O3γ		4	1	2
O3αβ		1	1	1
O10		1	0	0
O11αβ,2β		0	0	0
O12		0	0	0
unknown (OL15)		0	0	0

## Sheet: ST7 Plasmids with bla
AMR plasmids (proposed name)	CAI	HAI	Unknown	TOTAL	blaCTX-M-15	blaNDM-1	blaNDM-5	blaOXA-1	blaOXA-181	blaOXA-232	blaOXA-48	blaSHV-1	blaSHV-12	blaTEM-1	blaTEM-150	blaVIM-1	bleMBL
ColKP3	0	1	0	1						1
ColRNAI_rep_cluster_1857	0	9	0	9	8			8						6	1
ColRNAI_rep_cluster_1857/IncX3	0	2	0	2					2					1
ColRNAI_rep_cluster_1987	0	1	0	1
IncC	0	2	1	3	2									1
IncC/IncFIB	0	1	0	1
IncFIA	1	25	3	29	4		8		2					6			8
IncFIA/IncFIB				0
IncFIA/IncFIB/IncFIB/IncFII	0	1	0	1	1
IncFIA/IncFIB/IncFII	0	14	0	14	10
IncFIA/IncFIB/IncFII/IncR	0	0	2	2	2									2
IncFIA/IncFIB/IncHI1B/IncR	0	3	1	4
IncFIA/IncFIB/IncR	0	6	0	6				4
IncFIA/IncFIC	1	11	3	15	3		7	2	2					8			7
IncFIA/IncFIC/IncR	0	3	0	3										3
IncFIA/IncFII	0	2	0	2	1
IncFIA/IncFII/IncFII				0
IncFIA/IncR	0	9	4	13	4									3	2
IncFIA/IncR/IncX3	0	0	1	1					1
IncFIB	4	39	7	50	20	2		17	1			2		17			2
IncFIB/IncFIB	0	1	0	1
IncFIB/IncFIB/IncR	0	3	0	3
IncFIB/IncFII	5	89	8	102	50	1		19	12			1		28	1		1
IncFIB/IncFII/IncFII	0	1	0	1
IncFIB/IncFII/IncR	1	28	2	31	24			1	8					4
IncFIB/IncHI1B	1	82	9	92	41	86		82	1	2					83		86
IncFIB/IncHI1B/IncQ1	0	6	0	6	2	6		6									6
IncFIB/IncHI1B/IncR	0	3	0	3	3	2	1	3						1	2		3
IncFIB/IncR	0	5	0	5	1								1
IncFIB/IncU	0	0	2	2
IncFII	2	35	3	40	7	1			7								1
IncFII/IncQ1/IncR	0	1	0	1
IncFII/IncR	0	4	0	4
IncFII/IncX3	0	1	0	1				1
IncHI1B	0	1	0	1	1	1		1							1		1
IncHI2A	0	1	0	1	1			1						1
IncHI2A/IncR				0
IncL/M	0	6	0	6					1		2			1		1
IncL/M/IncR	0	1	0	1
IncN	0	7	0	7										1
IncQ1	0	1	0	1										1
IncR	1	24	3	28	6									2
IncR/IncX3	0	1	0	1					1
IncX3	5	109	15	129	16	4			126				2	3			4

## Sheet: ST8 Plasmids virulence genes
Virulence plasmids (proposed name)	CAI	HAI	Unknown	TOTAL	iuc1	iuc2	iuc2A	iuc5	iro1	iro2	iro5	rmp1; KpVP-1	RMP2; KpVP-2	rmpA2	iucA	iucB	iucC	iucD	iutA	iroB	iroC	iroD	iroN	rmpA	rmpD	rmpC
Col(IMGS31)	0	1	0	1
Col(MG828)	0	2	1	3
Col156	1	1	0	2
ColKP3	0	1	0	1
ColpVC	1	6	0	7
ColRNAI_rep_cluster_1857	4	34	6	44
ColRNAI_rep_cluster_1857/IncX3	0	2	0	2
ColRNAI_rep_cluster_1987	11	163	21	195
ColRNAI_rep_cluster_1987/ColRNAI_rep_cluster_1987	0	3	1	4
ColRNAI_rep_cluster_1987/ColRNAI_rep_cluster_1987/IncFIB/IncFII	0	1	0	1
ColRNAI_rep_cluster_1987/IncFII	0	1	0	1
ColRNAI_rep_cluster_1987/IncFII/IncR	0	1	0	1
IncC	0	3	1	4
IncC/IncFIB	0	1	0	1
IncFIA	3	62	8	73
IncFIA/IncFIB	0	5	0	5				2			2				2	2	2	2	2	2	2	2	2
IncFIA/IncFIB/IncFIB/IncFII	0	1	0	1
IncFIA/IncFIB/IncFII	1	18	0	19
IncFIA/IncFIB/IncFII/IncR	0	1	2	3
IncFIA/IncFIB/IncHI1B/IncR	0	3	1	4
IncFIA/IncFIB/IncR	0	6	0	6
IncFIA/IncFIC	1	13	3	17
IncFIA/IncFIC/IncFIB	0	4	0	4				4			4				4	4	4	4	4	4	4	4	4
IncFIA/IncFIC/IncR	0	3	0	3
IncFIA/IncFII	9	9	2	20
IncFIA/IncR	0	12	5	17
IncFIA/IncR/IncX3	0	0	1	1
IncFIB	27	148	22	197	4	14	1		4	14		5	14	4	19	19	19	19	19	18	18	18	19	19	19	19
IncFIB/IncFIB	0	1	0	1
IncFIB/IncFIB/IncR	0	3	0	3
IncFIB/IncFII	12	139	24	175		1				1			1		1	1	1	1	1	2	2	2	2	1	1	1
IncFIB/IncFII/IncFII	0	3	0	3
IncFIB/IncFII/IncFII/IncFII	0	1	0	1
IncFIB/IncFII/IncFII/IncN	0	1	0	1
IncFIB/IncFII/IncR	1	34	3	38
IncFIB/IncHI1B	13	95	13	121	25				23			23		25	25	25	25	25	25	23	23	22	24	25	24	24
IncFIB/IncHI1B/IncQ1	0	6	0	6
IncFIB/IncHI1B/IncR	0	3	0	3
IncFIB/IncR	0	10	0	10
IncFIB/IncU	3	2	4	9
IncFII	11	60	7	78
IncFII/IncFII	0	1	0	1
IncFII/IncFII/IncR	0	1	0	1
IncFII/IncQ1/IncR	0	1	0	1
IncFII/IncR	0	6	1	7
IncFII/IncX3	0	1	0	1
IncHI1B	0	1	1	2	1				1			1		1	1	1	1	1	1	1	1	1	1	1	1	1
IncHI2A	0	1	0	1
IncI-gamma/K1	0	1	0	1
IncL/M	0	9	0	9
IncL/M/IncR	0	1	1	2
IncN	0	11	0	11
IncQ1	0	1	0	1
IncR	5	59	9	73
IncR/IncX3	0	1	0	1
IncX1	0	1	1	2
IncX3	5	112	15	132
IncX4	0	0	1	1
IncY	0	1	0	1
